# Supplementary material for: An integrated framework to develop an efficient valid green (EVG) HPLC method for the assessment of antimicrobial pollutants with potential threats to human health in aquatic systems
Source: Royal Society of Chemistry journal article supplement (doi:10.1039/d3em00339f), 2023-01-01
Supplement: d3em00339f1.xlsx [file d3em00339f1.xlsx]

## Sheet: Sheet1
	Sarah S. Saleh, Hayam M. Lotfy, Heba T. Elbalkiny			An Integrated Framework to Develop an Efficient Valid Green (EVG) HPLC Method for Assessment of Antimicrobial Pollutants with Potential Threats for Human Health in Aquatic Systems
E	V	G		Efficiency	Evaluation criteria	3	2	1	0		Validation	Evaluation criteria	3	2	1	0		Greenness	Evaluation criteria	3	2	1	0
↓	↓	↓		A	Implementing DOE for screening / optimization	Full designs/ response surface methodology	fractional / reduced designs	one factor at a time study	No screening or optimization		A	Type of validation	Full	Partial	cross-validation	No validation		A	Number of greenness tools	3 ≤	2	1	0
Efficiency	Validation	Greenness		B	Number of CQAs	> 3	3	2	0		B	Precision	Repeatability, intermediate precision & Reproducibility	Repeatability & intermediate precision	Repeatability only	No precision		B	Sample treatment	no treatment (direct analysis)	Simple procedure	Extraction	Complex procedure / derivitization
				C	Number of CMPs	> 3	3	2	0		C	Accuracy (SE)	> 0, ≤ 0.5	> 0.5, ≤ 1.0	> 1.0, ≤ 1.5	> 1.5, ≤ 2		C	Reagents & solvents (no. of GHS pictograms)	0	1-5	6-12	>12
				D	Minimize cost (time for analyzing one sample)	≤ 1 min	1-5 min	6-15 min	> 15 min		D	Quantitation limit	Ultratrace: < 0.01 ppm (10 ppb)	Trace: 0.01 ppm - 0.01 % (100 ppm)	Minor: 0.01 (100 ppm) to 1%	Major: 1-100 %		D	Instrumentations and energy	0 kWh per sample	> 0, < 0.1 kWh per sample	0.1-1.5 kWh per sample	> 1.5 kWh per sample
				E	Number of analyzed compounds per one experiment	> 10	4-10	2-4	1		E	Robustness (no. of factors' variations)	> 4	2-4	1	0		E	Waste	< 1 mL	1- 10 mL	10-50 mL	> 50 mL
	Efficiency	Validation	Greenness								Average Score	Quartile (Q)	Rating
A	3	3	2								3 > , ≥ 2.25	Q1	Excellent
B	2	2	1								2.25 > , ≥ 1.5	Q2	Very Good
C	2	2	2								1.5 > , ≥ 0.75	Q3	Fair
D	2	2	1								0.75 > , ≥ 0	Q4	Poor
E	1	2	2
Average score	2	2.2	1.6
