# Supplementary material for: An integrated framework to develop an efficient valid green (EVG) HPLC method for the assessment of antimicrobial pollutants with potential threats to human health in aquatic systems
Source: Royal Society of Chemistry journal article supplement (doi:10.1039/d3em00339f), 2023-01-01
Supplement: d3em00339f2.pdf [file d3em00339f2.pdf]

## Supplementary Material

# An Integrated Framework to Develop an Efficient Valid Green (EVG) HPLC Method for Assessment of Antimicrobial Pollutants with Potential Threats for Human Health in Aquatic Systems

Sarah S. Saleh <sup>a\*</sup>, Hayam M. Lotfy <sup>b</sup>, Heba T. Elbalkiny <sup>a</sup>

**Table SM1. Experimental matrix of the face-centered composite Optimization design.**

| Run | CMPs  |                  |              | CQAs |          |      |
|-----|-------|------------------|--------------|------|----------|------|
|     | A- pH | B-Acetonitrile % | C- Flow rate | Rs-2 | Run time | T-3  |
| 1   | 3.7   | 25               | 1.25         | 6.5  | 8        | 1.4  |
| 2   | 3.3   | 15               | 1.25         | 3    | 6.77     | 1.11 |
| 3   | 3.3   | 25               | 1.75         | 6.98 | 6.22     | 0.83 |
| 4   | 3.5   | 20               | 1.5          | 6.1  | 4.9      | 1.01 |
| 5   | 3.5   | 20               | 1.5          | 6    | 5.2      | 1.03 |
| 6   | 3.7   | 15               | 1.75         | 5.4  | 5.5      | 1.28 |
| 7   | 3.5   | 20               | 1.5          | 6.06 | 5        | 1.03 |
| 8   | 3.5   | 20               | 1.75         | 5.09 | 4.5      | 0.89 |
| 9   | 3.3   | 20               | 1.5          | 6.3  | 5.18     | 0.97 |
| 10  | 3.5   | 25               | 1.5          | 6.78 | 6.6      | 1.05 |
| 11  | 3.7   | 20               | 1.5          | 5.77 | 5        | 1.32 |
| 12  | 3.5   | 15               | 1.5          | 5.45 | 5        | 1.1  |
| 13  | 3.5   | 20               | 1.25         | 6.5  | 7        | 1.11 |
| 14  | 3.5   | 20               | 1.5          | 6.11 | 5.3      | 1.05 |
| 15  | 3.5   | 20               | 1.5          | 6.1  | 5.1      | 1.08 |
| 16  | 3.5   | 20               | 1.5          | 6.2  | 4.6      | 0.98 |

Table 2SM. Fractional factorial design of robustness study.

| Run      | Factor 1 | Factor 2     | Factor 3 | Response 1 | Response 2 | Response 3 |
|----------|----------|--------------|----------|------------|------------|------------|
|          | A: pH    | B: Flow rate | C: ACN   | Rs-2       | runtime    | T-3        |
|          |          | mL/min       | %        | 10         | 10         | 10         |
| 1        | 3.45     | 1.55         | 21       | 5.8        | 5.71       | 1.07       |
| 2        | 3.55     | 1.6          | 21       | 5.66       | 5.55       | 1.04       |
| 3        | 3.45     | 1.6          | 17       | 5.61       | 5.67       | 0.98       |
| 4        | 3.55     | 1.55         | 17       | 5.75       | 5.78       | 1.11       |
| RSD %    |          |              |          | 1.504      | 1.698      | 2.016      |
| Model    |          |              |          |            |            |            |
| F- value |          |              |          | 3.92       | 21.80      | 44.50      |
| p-value  |          |              |          | 0.3363     | 0.1497     | 0.1054     |

**Table 3SM. AGREE detailed analytical greenness reports.**

| Analytical Greenness report sheet                                                                                                    | Reported method [46]                                                              | Reported method [24]                                                                | Proposed EVG method                                                                 |        |       |        |
|--------------------------------------------------------------------------------------------------------------------------------------|-----------------------------------------------------------------------------------|-------------------------------------------------------------------------------------|-------------------------------------------------------------------------------------|--------|-------|--------|
|                                                                                                                                      |  |  |  |        |       |        |
| Criteria                                                                                                                             | Score                                                                             | Weight                                                                              | Score                                                                               | Weight | Score | Weight |
| 1. Direct analytical techniques should be applied to avoid sample treatment.                                                         | 0.3                                                                               | 2                                                                                   | 0.3                                                                                 | 2      | 0.3   | 2      |
| 2. Minimal sample size and minimal number of samples are goals.                                                                      | 0                                                                                 | 2                                                                                   | 0                                                                                   | 2      | 0     | 2      |
| 3. If possible, measurements should be performed in situ.                                                                            | 0.33                                                                              | 2                                                                                   | 0.33                                                                                | 2      | 0.33  | 2      |
| 4. Integration of analytical processes and operations saves energy and reduces the use of reagents.                                  | 0.8                                                                               | 2                                                                                   | 0.8                                                                                 | 2      | 1.0   | 2      |
| 5. Automated and miniaturized methods should be selected.                                                                            | 0.5                                                                               | 2                                                                                   | 0.5                                                                                 | 2      | 1.0   | 2      |
| 6. Derivatization should be avoided.                                                                                                 | 1.0                                                                               | 2                                                                                   | 1.0                                                                                 | 2      | 1.0   | 2      |
| 7. Generation of a large volume of analytical waste should be avoided, and proper management of analytical waste should be provided. | 0.29                                                                              | 2                                                                                   | 0                                                                                   | 2      | 0     | 2      |
| 8. Multi-analyte or multi-parameter methods are preferred versus methods using one analyte at a time.                                | 0.68                                                                              | 2                                                                                   | 0.74                                                                                | 2      | 0.82  | 2      |
| 9. The use of energy should be minimized.                                                                                            | 0.5                                                                               | 2                                                                                   | 0.5                                                                                 | 2      | 1.0   | 2      |
| 10. Reagents obtained from renewable sources should be preferred.                                                                    | 0.0                                                                               | 2                                                                                   | 0.5                                                                                 | 2      | 0.0   | 2      |
| 11. Toxic reagents should be eliminated or replaced.                                                                                 | 0.29                                                                              | 2                                                                                   | 0.11                                                                                | 2      | 0.59  | 2      |
| 12. Operator's safety should be increased.                                                                                           | 0.6                                                                               | 2                                                                                   | 0.6                                                                                 | 2      | 0.6   | 2      |

**Table 4M. ComplexGAPI detailed analytical greenness reports.**

|                                  | Reported<br>method [46]              | Reported<br>method [24]              | Proposed<br>EVG method               |
|----------------------------------|--------------------------------------|--------------------------------------|--------------------------------------|
|                                  |                                      |                                      |                                      |
| <b>Sample preparation</b>        |                                      |                                      |                                      |
| I. Collection:                   | In-line ▼                            | In-line ▼                            | On-line or at-line ▼                 |
| II. Preservation:                | None ▼                               | None ▼                               | None ▼                               |
| III. Transport:                  | Required ▼                           | Required ▼                           | Required ▼                           |
| IV. Storage:                     | Under special condition ▼            | Under special condition ▼            | Under normal condition ▼             |
| V. Type of method:               | Extraction required ▼                | Extraction required ▼                | Extraction required ▼                |
| VI. Scale of extraction:         | Micro-extraction ▼                   | Micro-extraction ▼                   | Micro-extraction ▼                   |
| VII. Solvents/reagents used:     | Non-green solvents/reagents ▼        | Non-green solvents/reagents ▼        | Green solvents/reagents ▼            |
| VIII. Additional treatments:     | Simple treatments ▼                  | Simple treatments ▼                  | None ▼                               |
| <b>Reagents and solvents</b>     |                                      |                                      |                                      |
| I. Amount:                       | 10-100 mL (10-100 g) ▼               | 10-100 mL (10-100 g) ▼               | < 10 mL (< 10 g) ▼                   |
| II. Health hazard:               | Moderately toxic; could irritate ▼   | Moderately toxic; could irritate ▼   | Moderately toxic; could irritate ▼   |
| III. Safety hazard:              | Highest NFPA flammability ▼          | Highest NFPA flammability ▼          | Highest NFPA flammability ▼          |
| <b>Instrumentation</b>           |                                      |                                      |                                      |
| 2. Energy:                       | <= 0.1 kWh per sample ▼              | <= 1.5 kWh per sample ▼              | <= 1.5 kWh per sample ▼              |
| 3. Occupational hazard:          | Hermetic sealing of the instrument ▼ | Hermetic sealing of the instrument ▼ | Hermetic sealing of the instrument ▼ |
| 4. Waste:                        | > 10 mL (> 10 g) ▼                   | > 10 mL (> 10 g) ▼                   | 1-10 mL (1-10 g) ▼                   |
| 5. Waste treatment:              | Degradation, passivation ▼           | Degradation, passivation ▼           | No treatment ▼                       |
| <b>Yield and conditions</b>      |                                      |                                      |                                      |
| I. Yield:                        | > 89% ▼                              | > 89% ▼                              | > 89% ▼                              |
| II. Temperature/time:            | Room temp., < 1 h ▼                  | Room temp., < 1 h ▼                  | Room temp., < 1 h ▼                  |
| <b>Relation to Green Economy</b> |                                      |                                      |                                      |
| III. Number of rules met:        | 1-2 ▼                                | 1-2 ▼                                | 5-6 ▼                                |
| <b>Reagents and solvents</b>     |                                      |                                      |                                      |
| IVa. Health hazard:              | Moderately toxic; could irritate ▼   | Moderately toxic; could irritate ▼   | Moderately toxic; could irritate ▼   |
| IVb. Safety hazard:              | Highest NFPA flammability ▼          | Highest NFPA flammability ▼          | Highest NFPA flammability ▼          |
| <b>Instrumentation</b>           |                                      |                                      |                                      |
| Va. Technical setup:             | Additional setups/semi-automation ▼  | Additional setups/semi-automation ▼  | Common setup ▼                       |
| Vb. Energy:                      | ≤ 1.5 kWh per sample ▼               | ≤ 1.5 kWh per sample ▼               | ≤ 0.1 kWh per sample ▼               |
| Vc. Occupational hazard:         | Hermetization of analytical system ▼ | Hermetization of analytical system ▼ | Hermetization of analytical system ▼ |
| <b>E-factor</b>                  |                                      |                                      |                                      |
| VI. E-factor input:              | 0.5                                  | 0.5                                  | 0.1                                  |

**Table 5SM. EVG radar chart evaluation criteria.**

| Efficiency | Evaluation criteria                                | 3                                                                | 2                                            | 1                              | 0                                        |
|------------|----------------------------------------------------|------------------------------------------------------------------|----------------------------------------------|--------------------------------|------------------------------------------|
| A          | Implementing DOE for screening / optimization      | Full designs/<br>response surface<br>methodology                 | fractional /<br>reduced designs              | one factor at a<br>time study  | No screening or<br>optimization          |
| B          | Number of CQAs                                     | > 3                                                              | 3                                            | 2                              | 0                                        |
| C          | Number of CMPs                                     | > 3                                                              | 3                                            | 2                              | 0                                        |
| D          | Minimize cost (time for<br>analyzing one sample)   | ≤ 1 min                                                          | 1-5 min                                      | 6-15 min                       | > 15 min                                 |
| E          | Number of analyzed compounds<br>per one experiment | > 10                                                             | 4-10                                         | 2-4                            | 1                                        |
| Validation | Evaluation criteria                                | 3                                                                | 2                                            | 1                              | 0                                        |
| A          | Type of validation                                 | Full                                                             | Partial                                      | cross-validation               | No validation                            |
| B          | Precision                                          | Repeatability,<br>intermediate<br>precision &<br>Reproducibility | Repeatability &<br>intermediate<br>precision | Repeatability only             | No precision                             |
| C          | Accuracy (SE)                                      | > 0, ≤ 0.5                                                       | > 0.5, ≤ 1.0                                 | > 1.0, ≤ 1.5                   | > 1.5, ≤ 2                               |
| D          | Sensitivity (LOQ)                                  | Ultratrace: < 0.01<br>ppm (10 ppb)                               | Trace: 0.01 ppm<br>- 0.01 % (100<br>ppm)     | Minor: 0.01 (100<br>ppm) to 1% | Major: 1-100 %                           |
| E          | Robustness (no. of factors'<br>variations)         | > 4                                                              | 2-4                                          | 1                              | 0                                        |
| Greenness  | Evaluation criteria                                | 3                                                                | 2                                            | 1                              | 0                                        |
| A          | Number of greenness tools                          | 3 ≤                                                              | 2                                            | 1                              | 0                                        |
| B          | Sample treatment                                   | no treatment<br>(direct analysis)                                | Simple<br>procedure                          | Extraction                     | Complex<br>procedure /<br>derivitization |
| C          | Reagents & solvents (no. of GHS<br>pictograms)     | 0                                                                | 1-5                                          | 6-12                           | >12                                      |
| D          | Instrumentations and energy                        | 0 kWh per sample                                                 | > 0, < 0.1 kWh<br>per sample                 | 0.1-1.5 kWh per<br>sample      | > 1.5 kWh per<br>sample                  |
| E          | Waste                                              | < 1 mL                                                           | 1- 10 mL                                     | 10-50 mL                       | > 50 mL                                  |

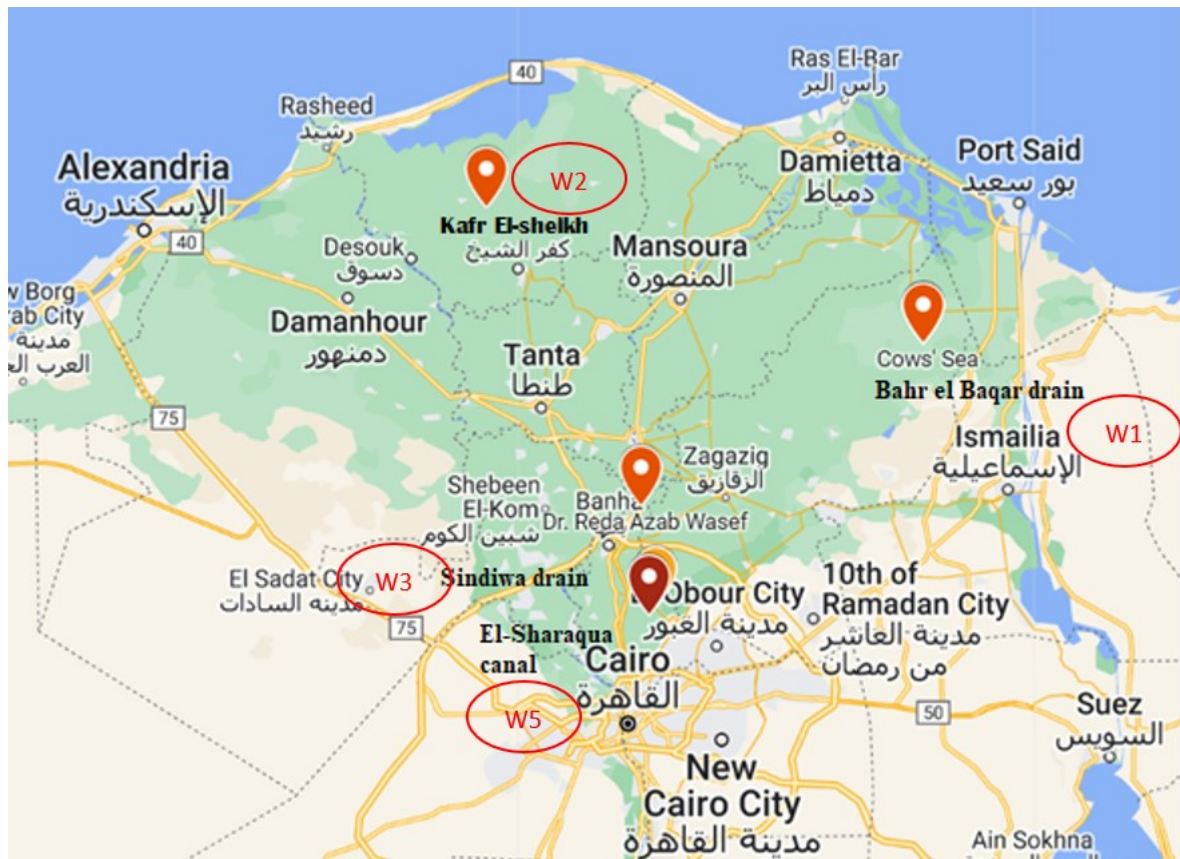

Fig.1SM. Map of samples of Nile River freshwater at different locations.

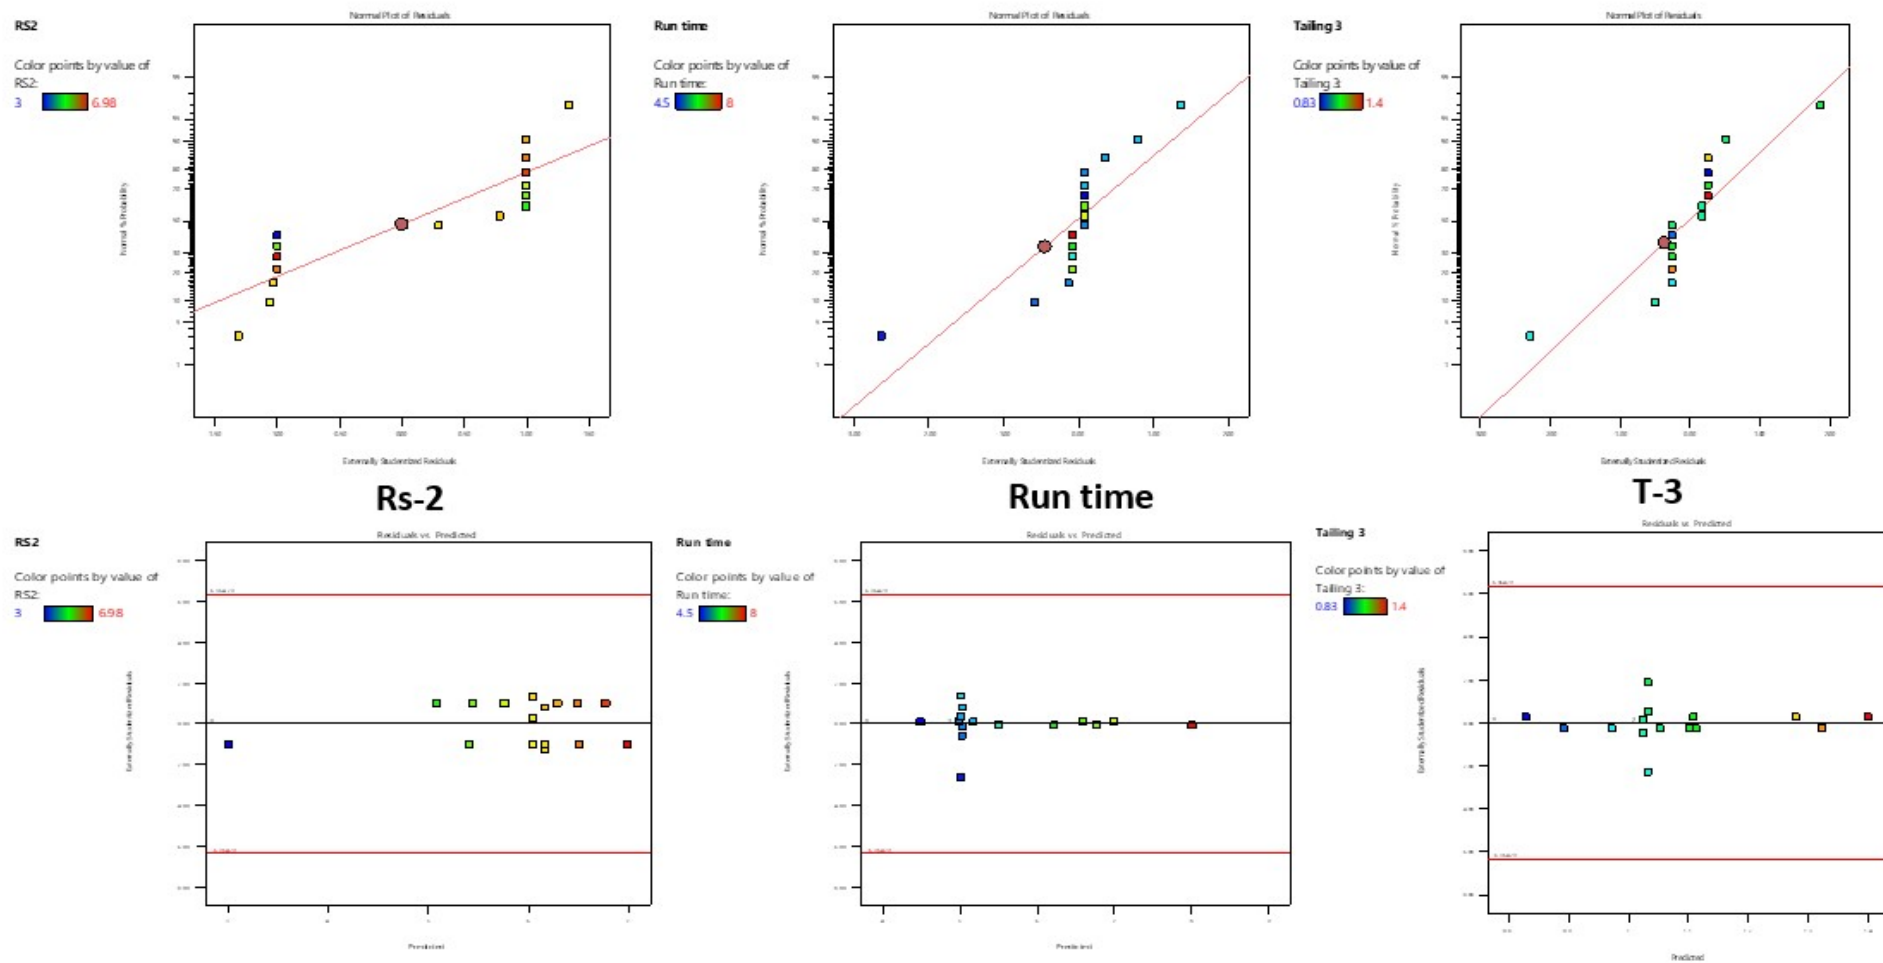

Fig. 2SM. Half normal plots and residual vs predicted plots of the FCC design.

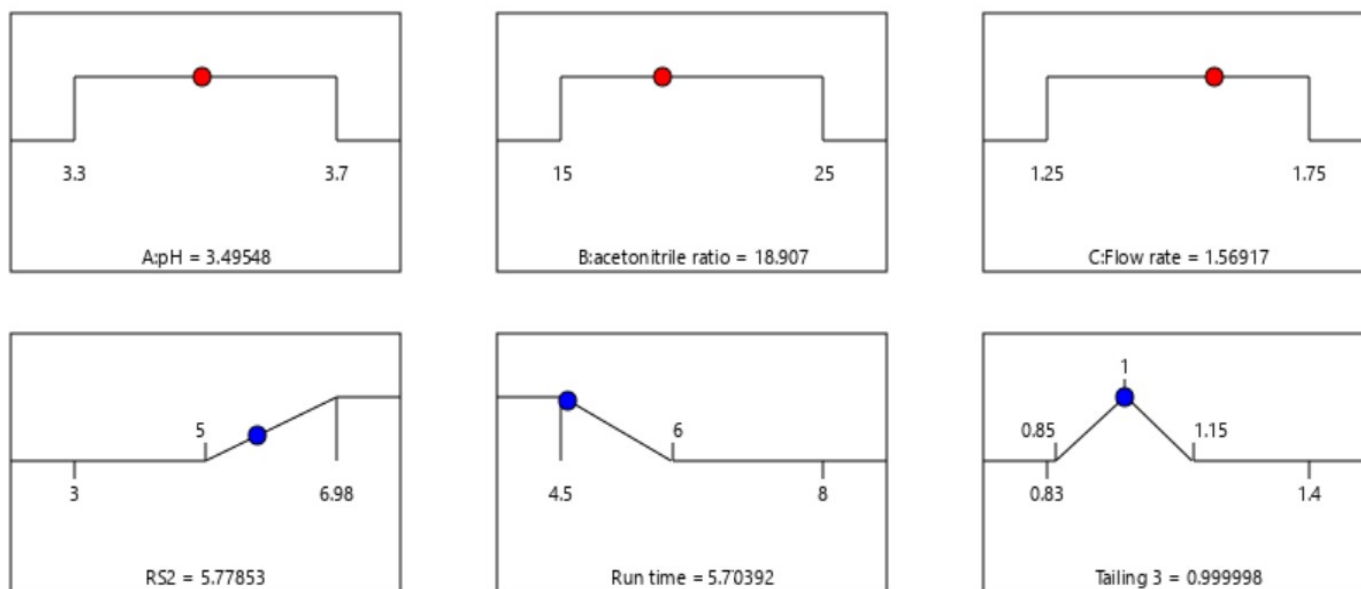

**Fig. 3SM.** Solution ramps for optimum chromatographic conditions with a desirability index of 0.764.



A: pH  
B: Flow rate  
C: ACN

Positive Effects  
Negative Effects

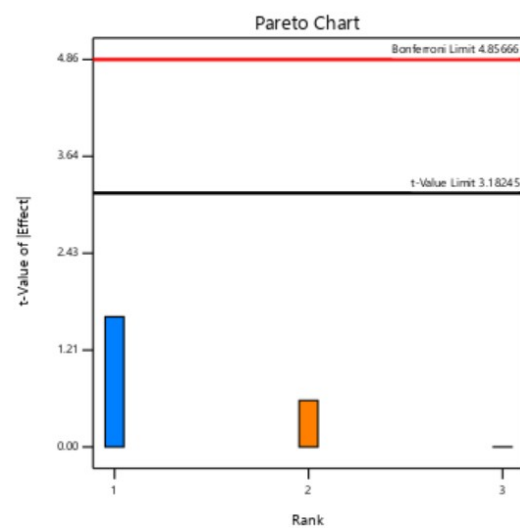

(a)

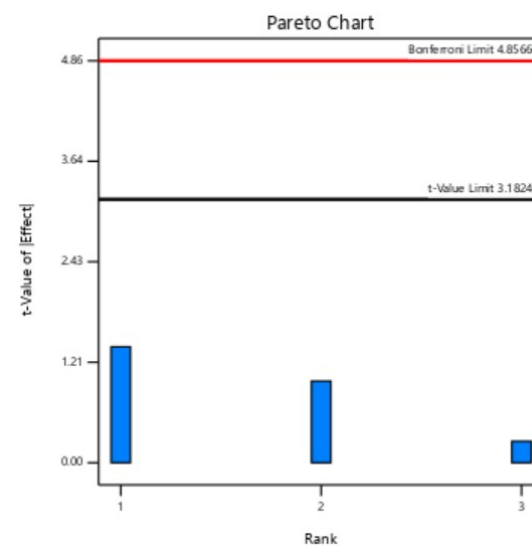

(b)

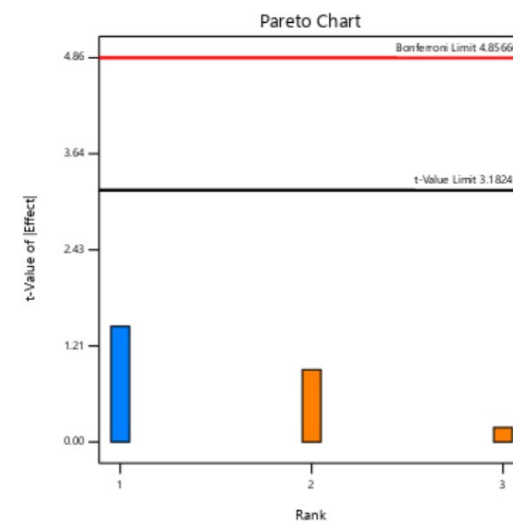

(c)

Fig. 4SM. Pareto chart of robustness study for the CQAs (a) Rs-2, (b) runtime, and (c) T-3.
